# Supplementary material for: Turning a “useless” ligand into a “useful” ligand: a magneto-structural study of an unusual family of CuII wheels derived from functionalised phenolic oximes
Source: Royal Society of Chemistry journal article supplement (doi:10.1039/c5dt00884k), 2015-01-01
Supplement: c5dt00884k1.pdf [file c5dt00884k1.pdf]

## Supporting Information

### Turning a “useless” ligand into a “useful” ligand: a magneto-structural study of an unusual family of Cu<sup>II</sup> wheels derived from functionalised phenolic oximes

Jamie M. Frost, Robert J. Stirling, Sergio Sanz, Nidhi Vyas, Gary S. Nichol, Gopalan Rajaraman and Euan K. Brechin

#### Experimental Procedures:

<sup>1</sup>H and <sup>13</sup>C NMR spectra were recorded on an avo 500 MHz spectrometer. 1-3-((bis(2-hydroxyethyl)amino)methyl)-2-hydroxy-5-methylsalicylaldoxime was prepared by a previously published procedure.<sup>1</sup> Solvents and reagents were used as received from commercial suppliers.

#### Synthesis of {1-3-((bis(2-hydroxyethyl)amino)methyl)-2-hydroxy-5-methylpropiophenoneoxime (H<sub>4</sub>L<sub>2</sub>)

3-((bis(2-hydroxyethyl)amino)methyl)-2-hydroxy-5-propiophenone (10.0 g, 35 mmol), hydroxylamine hydrochloride (3.5 g, 50 mmol) and sodium acetate (4.14 g, 50 mmol) were dissolved in 400 mL of ethanol. The mixture was refluxed under N<sub>2</sub> for 24 h. A white precipitate was filtered off from the warm ethanol solution. The solvent is evaporated to dryness, CH<sub>2</sub>Cl<sub>2</sub> is added and a white product collected after filtration (9.14 g, 84%). <sup>1</sup>H NMR (500 MHz, DMSO): δ 7.12 (bs, 1H), 7.05 (bs, 1H), 3.60 (s, 2H), 3.54 (t, *J*=6.2 Hz, 4H), 2.53 (t, *J*= 6.2 Hz, 4H), 2.23 (s, 3H), 2.22 (s, 3H). <sup>13</sup>C NMR (500 MHz, DMSO): δ 157.28 (1C, C<sub>ar</sub>OH), 153.86 (1C, CNOH), 131.34 (1C, CH), 127.61 (1C, CH), 126.99 (1C, C), 124.34 (1C, C), 121.01 (1C, C), 59.14 (2C, CH<sub>2</sub>), 56.51 (2C, CH<sub>2</sub>), 54.78 (1C, CH<sub>2</sub>), 21.69 (1C, CH<sub>3</sub>), 12.73 (1C, CH<sub>3</sub>).

|                                           | 1                                                                                               | 2                                                                                                        | 3                                                                               | 4                                                                                                                       | 5                                                                                |
|-------------------------------------------|-------------------------------------------------------------------------------------------------|----------------------------------------------------------------------------------------------------------|---------------------------------------------------------------------------------|-------------------------------------------------------------------------------------------------------------------------|----------------------------------------------------------------------------------|
| Empirical formula                         | C <sub>58</sub> H <sub>83</sub> Cl <sub>4</sub> Cu <sub>8</sub> N <sub>8</sub> O <sub>18</sub>  | C <sub>56</sub> H <sub>76</sub> Cl <sub>0.79</sub> Cu <sub>8</sub> N <sub>11.21</sub> O <sub>25.62</sub> | C <sub>69</sub> H <sub>108</sub> Cu <sub>8</sub> N <sub>8</sub> O <sub>29</sub> | C <sub>90.78</sub> H <sub>129.13</sub> B <sub>2</sub> Cu <sub>8</sub> F <sub>8</sub> N <sub>12</sub> O <sub>24.78</sub> | C <sub>67</sub> H <sub>120</sub> Cu <sub>8</sub> N <sub>20</sub> O <sub>27</sub> |
| Formula weight                            | 1830.44                                                                                         | 1852.53                                                                                                  | 2021.95                                                                         | 2467.01                                                                                                                 | 2146.17                                                                          |
| Temperature, K                            | 170                                                                                             | 170                                                                                                      | 120                                                                             | 120.0                                                                                                                   | 120.0                                                                            |
| Wavelength, Å                             | Mo Kα (0.71073)                                                                                 | Mo Kα (0.71073)                                                                                          | Cu Kα (1.54184)                                                                 | Mo Kα (0.71073)                                                                                                         | Cu Kα (1.54184)                                                                  |
| Crystal system                            | Orthorhombic                                                                                    | Hexagonal                                                                                                | Cubic                                                                           | Monoclinic                                                                                                              | Orthorhombic                                                                     |
| Space group                               | <i>Pbca</i>                                                                                     | <i>P62</i>                                                                                               | <i>Pn-3n</i>                                                                    | <i>C2/c</i>                                                                                                             | <i>Pbca</i>                                                                      |
| a, Å                                      | 25.5938(6)                                                                                      | 20.2162(4)                                                                                               | 37.57080(16)                                                                    | a = 23.3511(4)                                                                                                          | 25.2990(5)                                                                       |
| b, Å                                      | 19.9423(4)                                                                                      | 20.2162(4)                                                                                               | 37.57080(16)                                                                    | 17.1783(2)                                                                                                              | 20.7375(4)                                                                       |
| c, Å                                      | 32.2211(6)                                                                                      | 16.8492(3)                                                                                               | 37.57080(16)                                                                    | 26.2510(5)                                                                                                              | 32.5445(8)                                                                       |
| a, °                                      | 90                                                                                              | 90                                                                                                       | 90                                                                              | 90                                                                                                                      | 90                                                                               |
| b, °                                      | 90                                                                                              | 90                                                                                                       | 90                                                                              | 101.0240(17)                                                                                                            | 90                                                                               |
| g, °                                      | 90                                                                                              | 120                                                                                                      | 90                                                                              | 90                                                                                                                      | 90                                                                               |
| Volume, Å <sup>3</sup>                    | 16445.6(6)                                                                                      | 5963.6(3)                                                                                                | 53033.6(7)                                                                      | 10335.8(3)                                                                                                              | 17074.1(6)                                                                       |
| Z                                         | 8                                                                                               | 3                                                                                                        | 24                                                                              | 4                                                                                                                       | 8                                                                                |
| ρ (calc), Mg/m <sup>3</sup>               | 1.479                                                                                           | 1.547                                                                                                    | 1.519                                                                           | 1.585                                                                                                                   | 1.670                                                                            |
| μ, mm <sup>-1</sup>                       | 2.219                                                                                           | 2.199                                                                                                    | 2.726                                                                           | 1.704                                                                                                                   | 2.883                                                                            |
| Measd/indep. reflns                       | 97866/10680                                                                                     | 74631/5175                                                                                               | 232108/9253                                                                     | 72031/15269                                                                                                             | 87780/17342                                                                      |
| R <sub>(int)</sub>                        | 0.0818                                                                                          | 0.0695                                                                                                   | 0.0729                                                                          | 0.0390                                                                                                                  | 0.0744                                                                           |
| Goodness-of-fit on F <sup>2</sup>         | 1.070                                                                                           | 1.089                                                                                                    | 1.063                                                                           | 1.037                                                                                                                   | 1.070                                                                            |
| R1                                        | 0.0748                                                                                          | 0.0378                                                                                                   | 0.0467                                                                          | 0.0410                                                                                                                  | 0.0956                                                                           |
| wR2                                       | 0.2016                                                                                          | 0.1126                                                                                                   | 0.1404                                                                          | 0.1035                                                                                                                  | 0.2636                                                                           |
| Δρ <sub>max,min</sub> , e.Å <sup>-3</sup> | 2.823 and -0.641                                                                                | 0.878, -0.353                                                                                            | 1.266, -0.741                                                                   | 0.877, -0.748                                                                                                           | 2.987, -0.819                                                                    |
|                                           | 6                                                                                               | 7                                                                                                        | 8                                                                               | 9                                                                                                                       |                                                                                  |
| Empirical formula                         | C <sub>68</sub> H <sub>104</sub> Cl <sub>4</sub> Cu <sub>8</sub> N <sub>8</sub> O <sub>18</sub> | C <sub>132</sub> H <sub>198</sub> Br <sub>8</sub> Cu <sub>16</sub> N <sub>16</sub> O <sub>35</sub>       | C <sub>56</sub> H <sub>76</sub> Cu <sub>6</sub> N <sub>8</sub> O <sub>16</sub>  | C <sub>58.50</sub> H <sub>84</sub> Cu <sub>4</sub> N <sub>8</sub> Na <sub>2</sub> O <sub>18.50</sub>                    |                                                                                  |
| Formula weight                            | 1971.71                                                                                         | 4224.97                                                                                                  | 1498.48                                                                         | 1495.47                                                                                                                 |                                                                                  |
| Temperature, K                            | 200.0                                                                                           | 120.0                                                                                                    | 120.0                                                                           | 120.0                                                                                                                   |                                                                                  |
| Wavelength, Å                             | Cu Kα (1.54184)                                                                                 | Cu Kα (1.54184)                                                                                          | Cu Kα (1.54184)                                                                 | Mo Kα (0.71073)                                                                                                         |                                                                                  |
| Crystal system                            | Monoclinic                                                                                      | Monoclinic                                                                                               | Monoclinic                                                                      | Monoclinic                                                                                                              |                                                                                  |
| Space group                               | <i>I2/a</i>                                                                                     | <i>I2/a</i>                                                                                              | <i>C2/c</i>                                                                     | <i>C2/c</i>                                                                                                             |                                                                                  |
| a, Å                                      | 15.74110(10)                                                                                    | 15.8200(4)                                                                                               | 14.5984(3)                                                                      | 15.2213(3)                                                                                                              |                                                                                  |
| b, Å                                      | 20.12890(10)                                                                                    | 20.0425(4)                                                                                               | 26.6204(7)                                                                      | 26.3669(6)                                                                                                              |                                                                                  |
| c, Å                                      | 51.7316(5)                                                                                      | 51.3059(14)                                                                                              | 18.8428(4)                                                                      | 17.2409(4)                                                                                                              |                                                                                  |
| a, °                                      | 90                                                                                              | 90                                                                                                       | 90                                                                              | 90                                                                                                                      |                                                                                  |
| b, °                                      | 93.2820(10)                                                                                     | 93.223(2)                                                                                                | 104.153(2)                                                                      | 93.295(2)                                                                                                               |                                                                                  |
| g, °                                      | 90                                                                                              | 90                                                                                                       | 90                                                                              | 90                                                                                                                      |                                                                                  |
| Volume                                    | 16364.3(2) Å <sup>3</sup>                                                                       | 16242.0(7) Å <sup>3</sup>                                                                                | 7100.3(3) Å <sup>3</sup>                                                        | 6908.0(3) Å <sup>3</sup>                                                                                                |                                                                                  |
| Z                                         | 8                                                                                               | 4                                                                                                        | 4                                                                               | 4                                                                                                                       |                                                                                  |
| ρ (calc), Mg/m <sup>3</sup>               | 1.601                                                                                           | 1.728                                                                                                    | 1.402                                                                           | 1.438                                                                                                                   |                                                                                  |
| μ, mm <sup>-1</sup>                       | 3.997                                                                                           | 5.106                                                                                                    | 2.487                                                                           | 1.299                                                                                                                   |                                                                                  |
| Measd/indep. reflns                       | 200377/17064                                                                                    | 125018/14848                                                                                             | 44755/7393                                                                      | 57914/8317                                                                                                              |                                                                                  |
| R <sub>(int)</sub>                        | 0.0503                                                                                          | 0.1203                                                                                                   | 0.0474                                                                          | 0.0792                                                                                                                  |                                                                                  |
| Goodness-of-fit on F <sup>2</sup>         | 1.134                                                                                           | 1.066                                                                                                    | 1.056                                                                           | 1.045                                                                                                                   |                                                                                  |
| R1                                        | 0.0588                                                                                          | 0.0769                                                                                                   | 0.0486                                                                          | 0.0494                                                                                                                  |                                                                                  |
| wR2                                       | 0.2016                                                                                          | 0.2205                                                                                                   | 0.1410                                                                          | 0.1242                                                                                                                  |                                                                                  |
| Δρ <sub>max,min</sub> , e.Å <sup>-3</sup> | 1.913, -0.820                                                                                   | 1.451, -2.800                                                                                            | 1.116, -0.769                                                                   | 0.810, -0.503                                                                                                           |                                                                                  |

**Table S1:** A selection of crystallographic data for complexes 1-9 pertinent to the discussion in the main body.

| Configurations | Complex1 |     |     | Complex2 |     |     | Complex3 |     |     | Complex4 |     |     | Complex5 |     |     |     | Complex6 |     |     |
|----------------|----------|-----|-----|----------|-----|-----|----------|-----|-----|----------|-----|-----|----------|-----|-----|-----|----------|-----|-----|
|                | HS       | BS1 | BS2 | BS3 | HS       | BS1 | BS2 |
| Cu1            | ↑        | ↓   | ↑   | ↑        | ↓   | ↑   | ↑        | ↑   | ↑   | ↑        | ↑   | ↑   | ↑        | ↑   | ↑   | ↑   | ↑        | ↓   | ↑   |
| Cu2            | ↑        | ↑   | ↑   | ↑        | ↑   | ↓   | ↑        | ↑   | ↓   | ↑        | ↑   | ↑   | ↑        | ↑   | ↓   | ↑   | ↑        | ↑   | ↓   |
| Cu3            | ↑        | ↑   | ↑   | ↑        | ↑   | ↓   | ↑        | ↑   | ↑   | ↑        | ↑   | ↑   | ↑        | ↑   | ↑   | ↑   | ↑        | ↓   | ↑   |
| Cu4            | ↑        | ↑   | ↑   | ↑        | ↓   | ↑   | ↑        | ↑   | ↑   | ↑        | ↑   | ↑   | ↑        | ↑   | ↑   | ↑   | ↑        | ↓   | ↓   |
| Cu5            | ↑        | ↑   | ↑   | ↑        | ↑   | ↑   | ↑        | ↓   | ↓   | ↑        | ↓   | ↑   | ↑        | ↓   | ↓   | ↓   |          |     |     |
| Cu6            | ↑        | ↑   | ↑   | ↑        | ↓   | ↑   | ↑        | ↑   | ↑   | ↑        | ↑   | ↑   | ↑        | ↑   | ↑   | ↓   |          |     |     |
| Cu7            | ↑        | ↑   | ↓   | ↑        | ↑   | ↑   | ↑        | ↓   | ↓   | ↑        | ↑   | ↓   |          |     |     |     |          |     |     |
| Cu8            | ↑        | ↑   | ↓   | ↑        | ↓   | ↑   | ↑        | ↑   | ↓   | ↑        | ↑   | ↓   |          |     |     |     |          |     |     |

**Table S2.** The different spin configurations employed in the calculations of the magnetic exchange.

| Complex Name                                                                                     | $J_{1\text{DFT}}$ | $J_{2\text{DFT}}$ | $J_{3\text{DFT}}$ | $J_{1\text{Exp}}$ | $J_{2\text{Exp}}$ |
|--------------------------------------------------------------------------------------------------|-------------------|-------------------|-------------------|-------------------|-------------------|
| [Cu <sub>8</sub> (HL) <sub>4</sub> (Cl) <sub>4</sub> ]( <b>1</b> )                               | -44.97            | -320.49           |                   | -460.23           | +17.53            |
| [Cu <sub>8</sub> (HL) <sub>4</sub> (NO <sub>3</sub> ) <sub>4</sub> ]( <b>2</b> )                 | -46.61            | -278.27           |                   | -389.65           | -219.22           |
| [Cu <sub>6</sub> (HL) <sub>4</sub> ]( <b>8</b> )                                                 | 5.53              | -25.9             | -120.6            |                   |                   |
| [Cu <sub>4</sub> Na <sub>2</sub> (HL) <sub>2</sub> (H <sub>2</sub> L) <sub>2</sub> ]( <b>9</b> ) | -95.78            | 0.08              |                   | -271.31           | N/A               |

Table S3. DFT computed exchange constants for **1**, **2**, **8** and **9**.

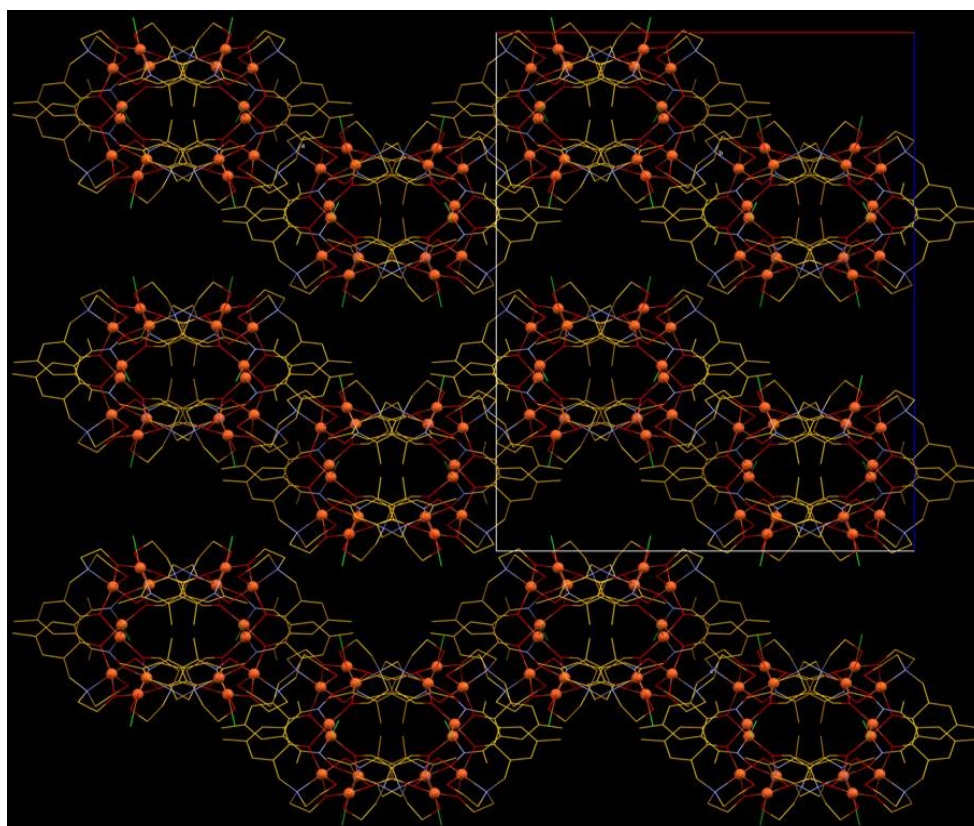

Figure S2: Packing of molecules of **1** as viewed down the *b*-axis of the crystal. H-atoms omitted for clarity.

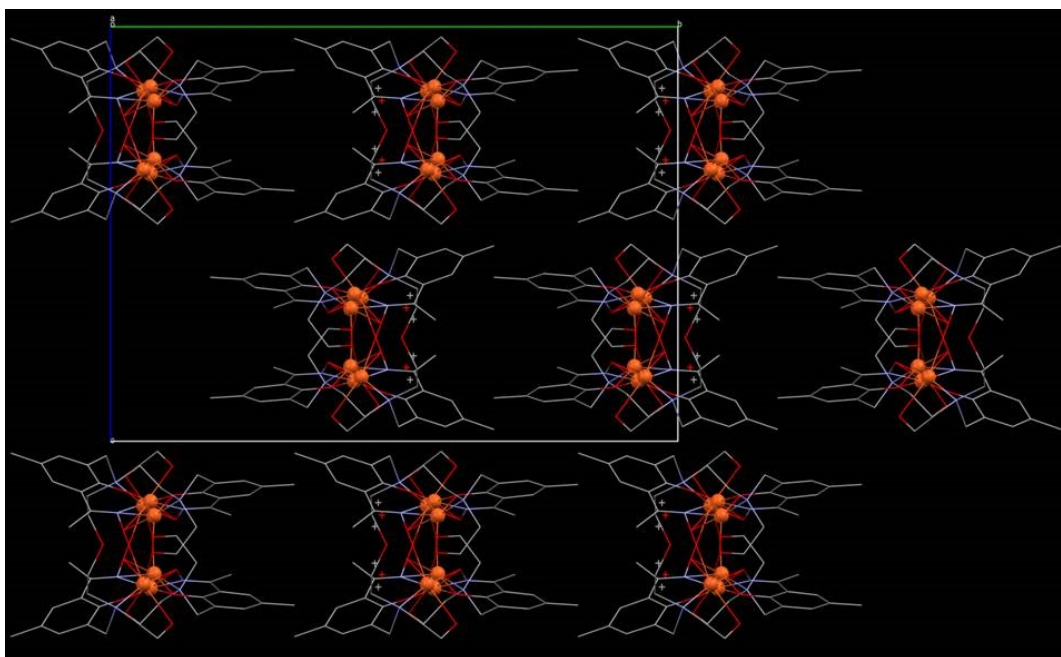

**Figure S3:** Packing of molecules of **8** as viewed down the  $a$ -axis of the crystal. H-atoms omitted for clarity.

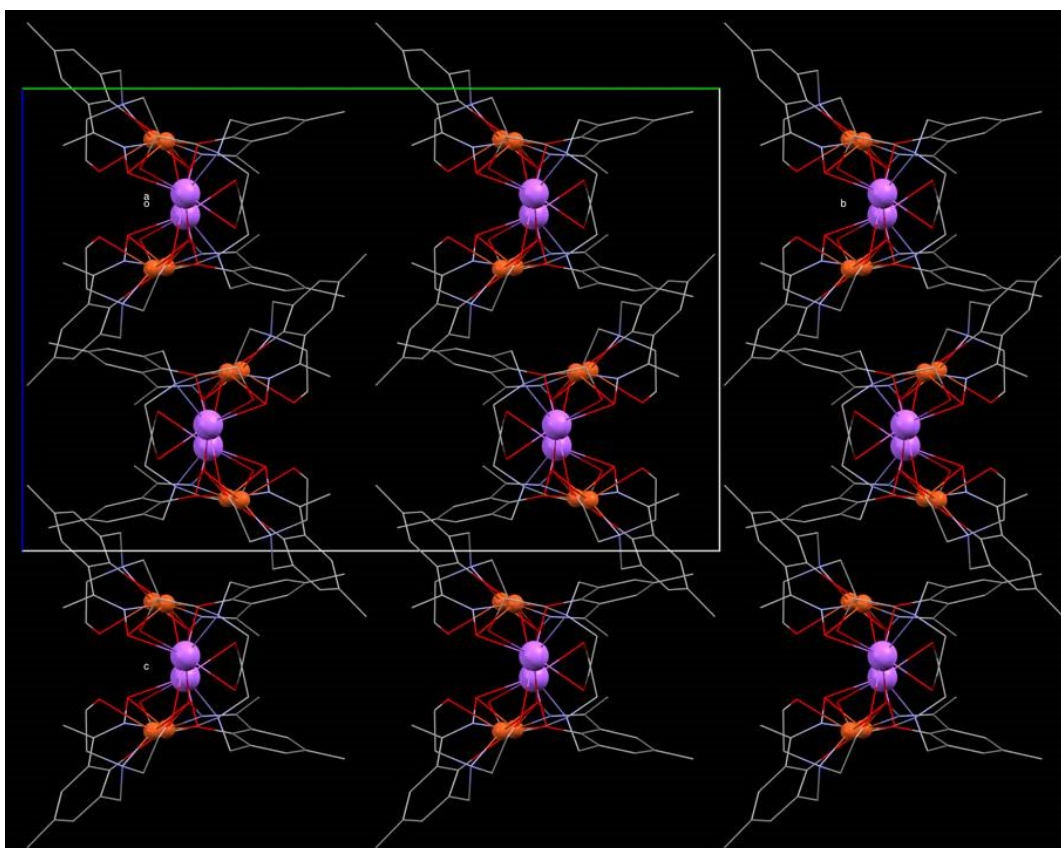

**Figure S4:** Packing of molecules of **9** as viewed down the  $a$ -axis of the crystal. H-atoms omitted for clarity.

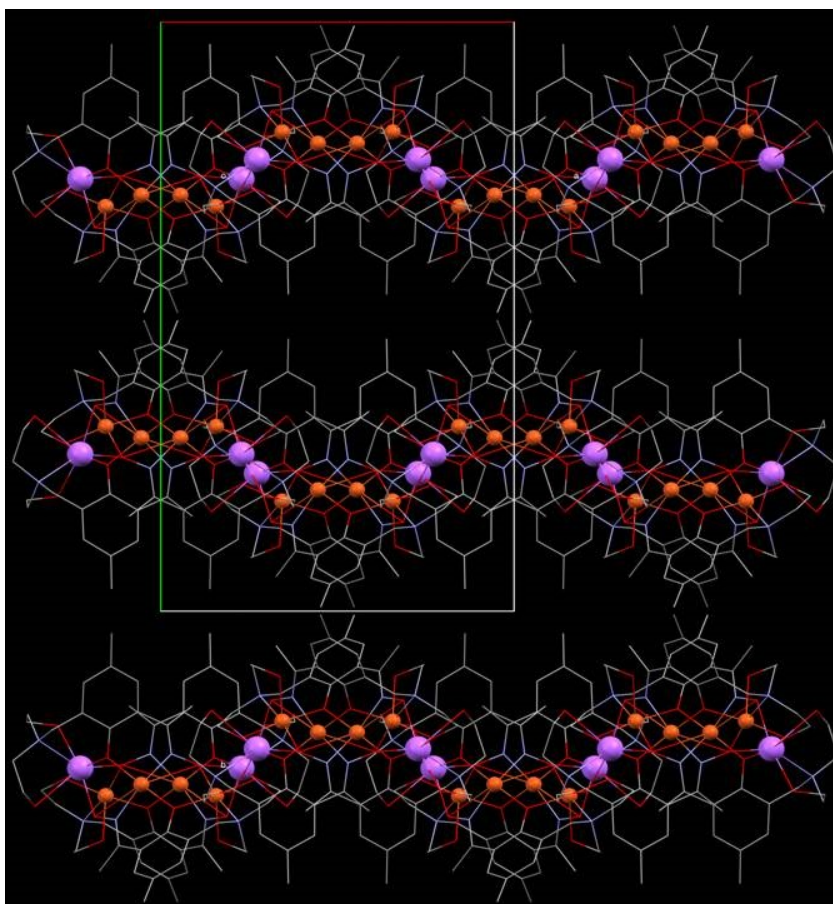

**Figure S5:** Packing of molecules of **9** as viewed down the c-axis of the crystal. H-atoms omitted for clarity.

**Figure S6** Representative MO diagram depicting the symmetric combinations of the  $dx^2-y^2$  orbitals of complex **1**.

**Figure S7** Computed spin density plot of complex **2**.

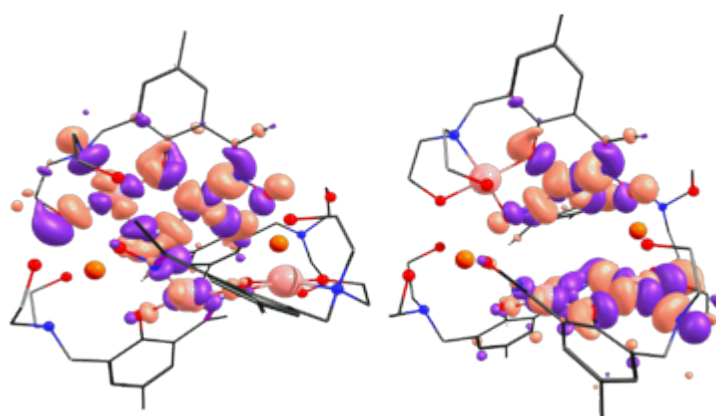

**Figure S8** Representative MO diagrams employed to calculate the overlap integrals in complex **9**.

## References

1. S. Sanz, J. M. Frost, T. Rajeshkumar, S. J. Dalgarno, W. Wernsdorfer, J. Schnack, P. J. Lusby and E. K. Brechin, *Chem. Eur. J.*, 2014, **20**, 3010.
